# Supplementary material for: Hierarchical importance of coordination and hydrogen bonds in the formation of homochiral 2D coordination polymers and 2D supramolecular assemblies
Source: Royal Society of Chemistry journal article supplement (doi:10.1039/c4ce00387j), 2014-01-01
Supplement: c4ce00387j2.pdf [file c4ce00387j2.pdf]

# **Hierarchical importance of coordination and hydrogen bonds in the formation of homochiral 2D coordination polymers and 2D supramolecular assemblies**

**Navnita Kumar, Sadhika Khullar and Sanjay K. Mandal\***

*Department of Chemical Sciences, Indian Institute of Science Education and Research, Mohali, Sector 81, Manauli PO, S.A.S. Nagar, Mohali (Punjab) 140306, INDIA*

## Supplementary Information

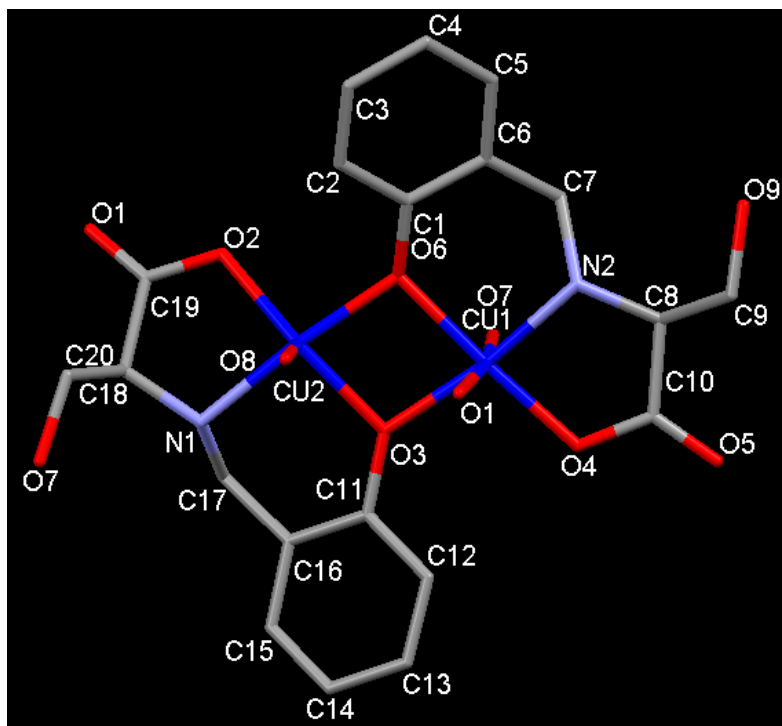

**Fig. S1** Dinuclear subunit in **1**. Hydrogen atoms are omitted for clarity.

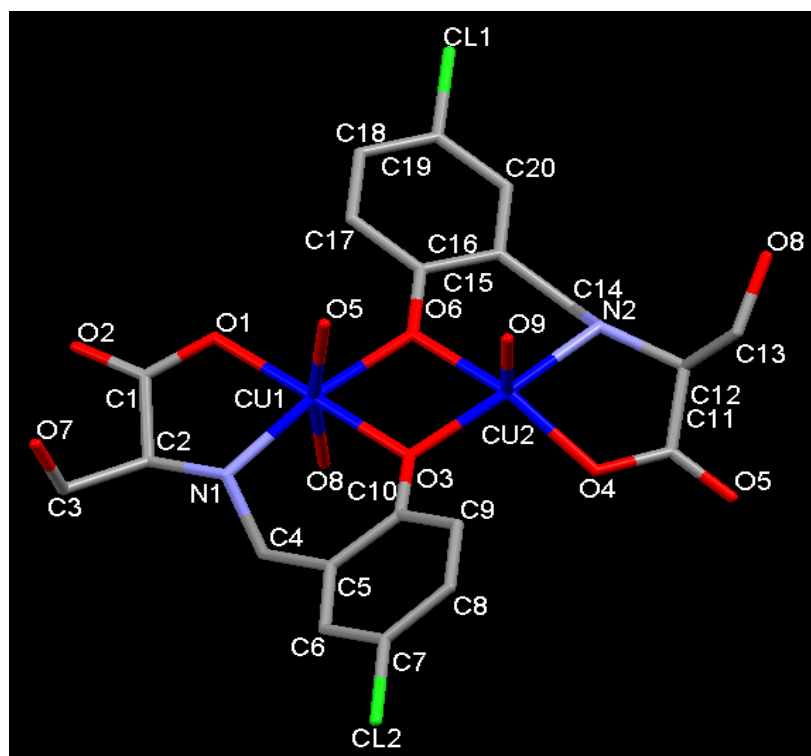

**Fig. S2** Dinuclear subunit in **4**. Hydrogen atoms are omitted for clarity.

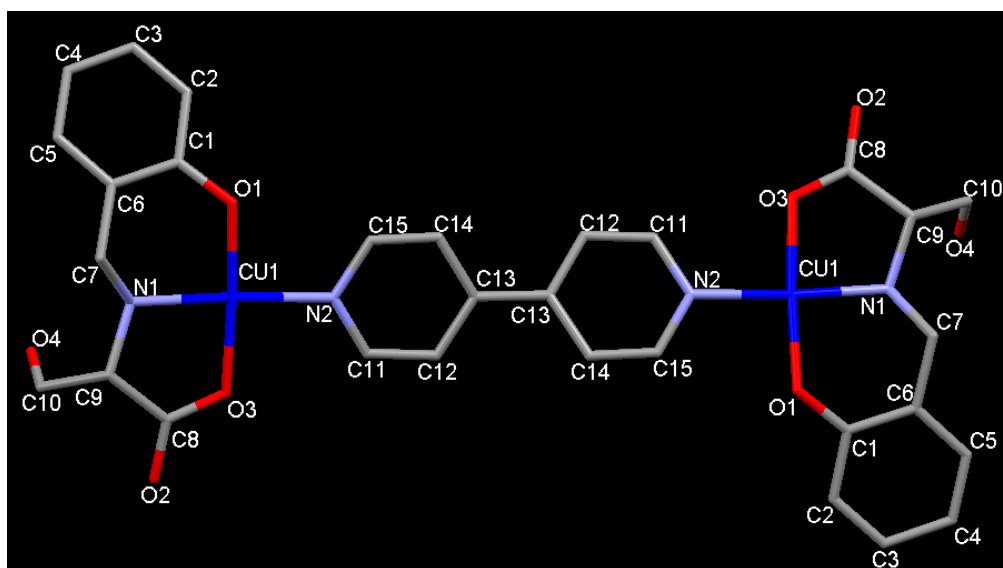

**Fig. S3.** Dinuclear subunit in **7**. Hydrogen atoms are omitted for clarity.

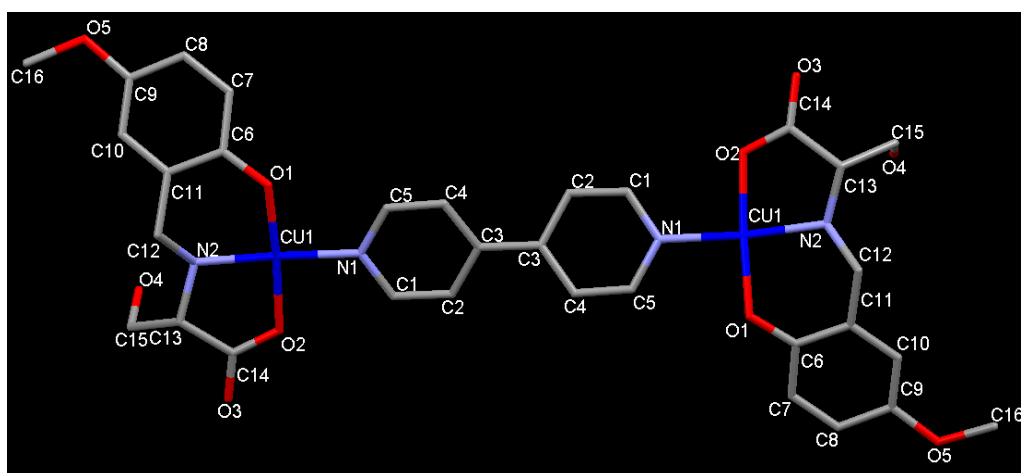

**Fig. S4.** Dinuclear subunit in **8**. Hydrogen atoms are omitted for clarity.

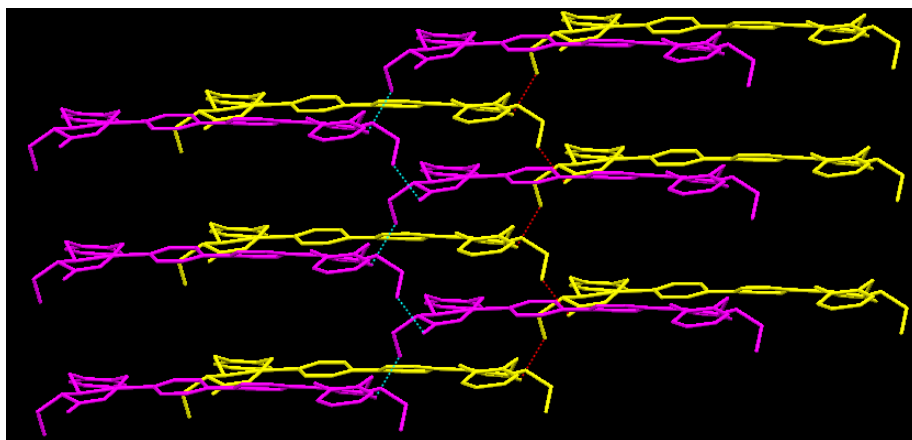

**Fig. S5** Two layers of discrete unit (one layer shown in magenta other in yellow) each forming 2D supramolecular assembly via hydrogen bonding (for one layer shown in green other shown in red) in **7**.

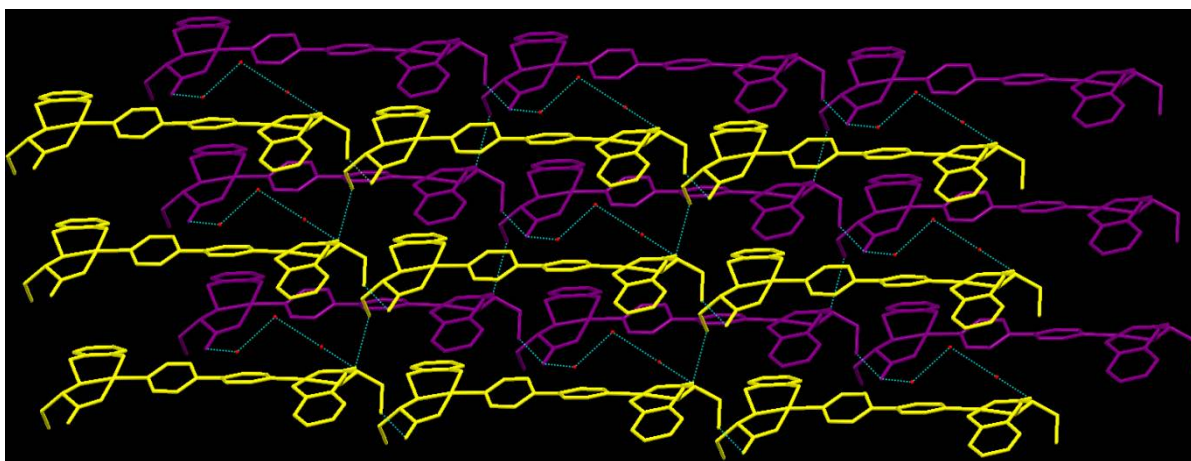

**Fig. S6a** Two 2D supramolecular assembly joined via solvent molecules in **7**. Hydrogen atoms are omitted for clarity

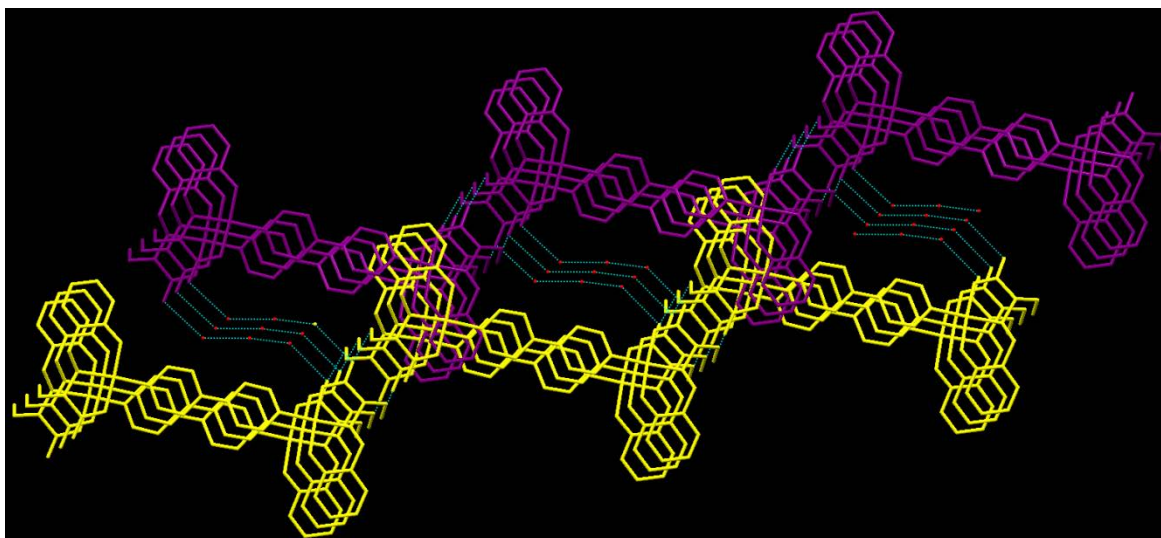

**Fig. S6b** Another view of solvent molecules joining the two 2D supramolecular assemblies in **7**.

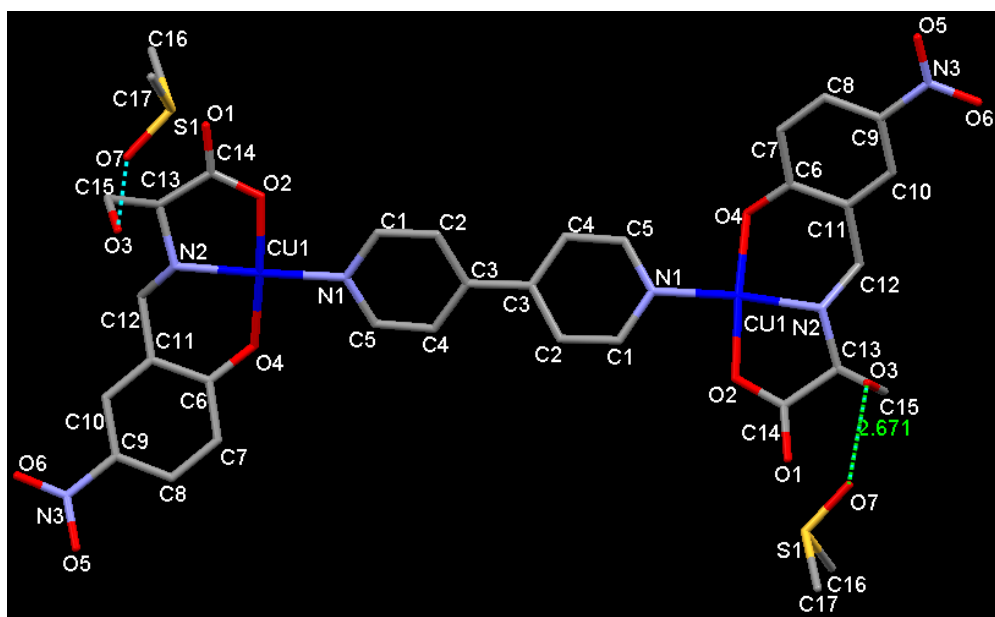

**Fig. S7** Dinuclear unit in **9**. Also shown hydrogen bonding with the lattice DMSO molecules. Hydrogen atoms are omitted for clarity

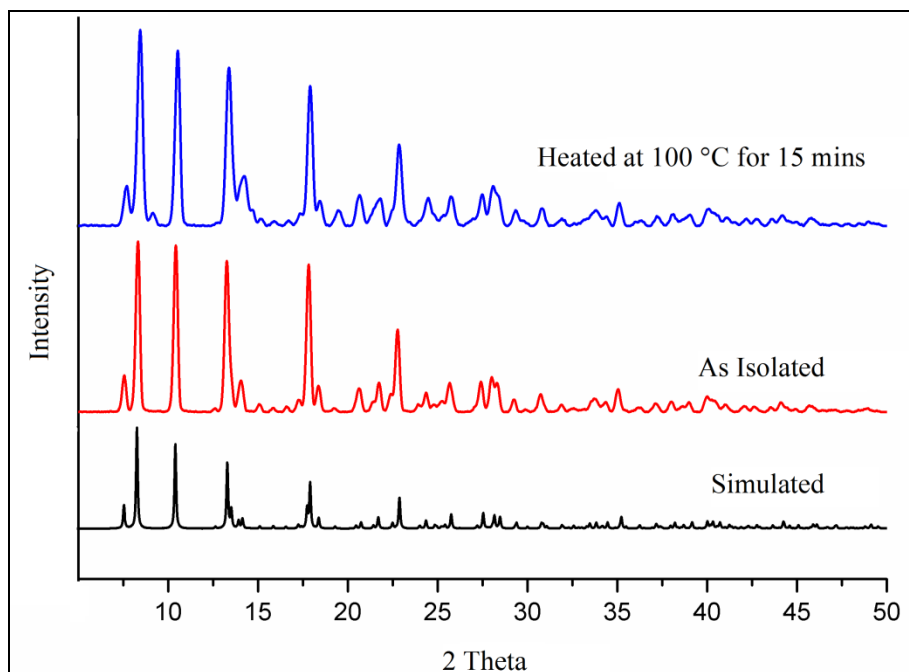

**Fig. S8** Experimental and simulated X-ray powder patterns for **1**.

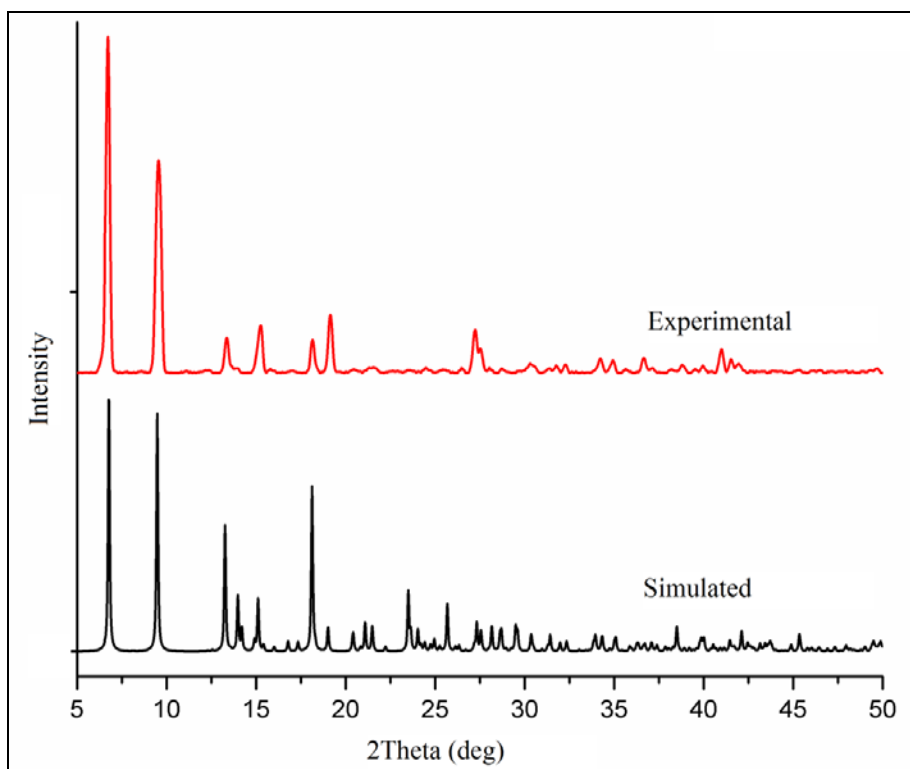

**Fig. S9** Experimental and simulated X-ray powder patterns for **4**.

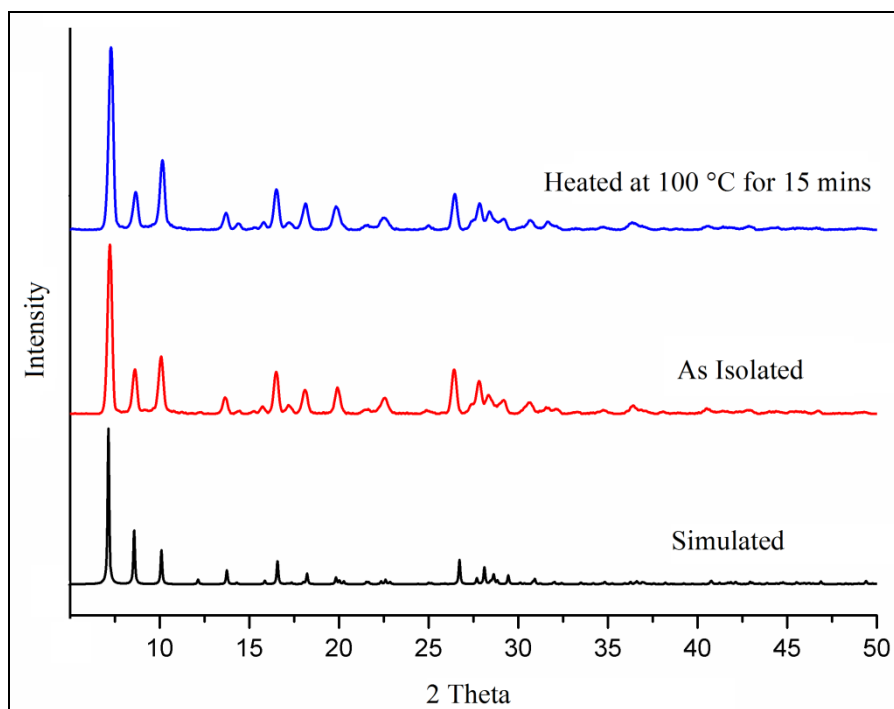

**Fig. S10** Experimental and simulated X-ray powder patterns for **7**.

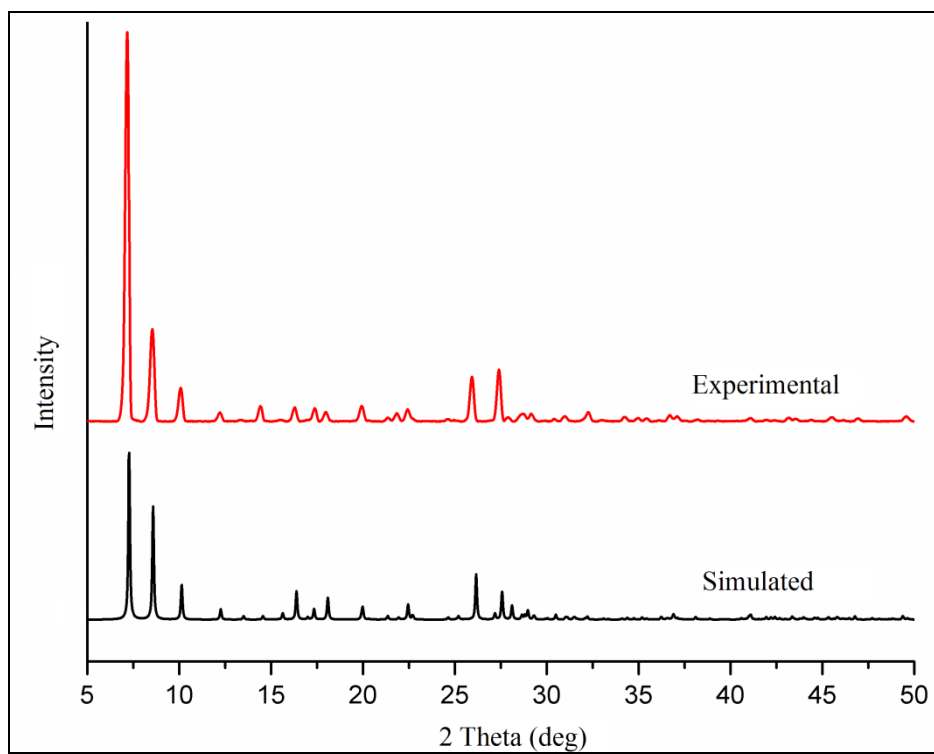

**Fig. S11** Experimental and simulated X-ray powder patterns for **8**.

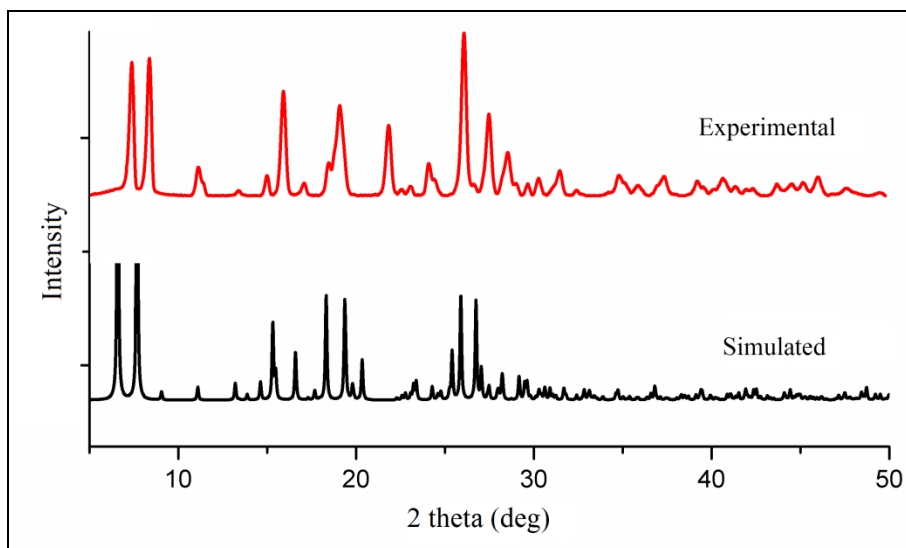

**Fig. S12** Experimental and simulated X-ray powder patterns for **9**.

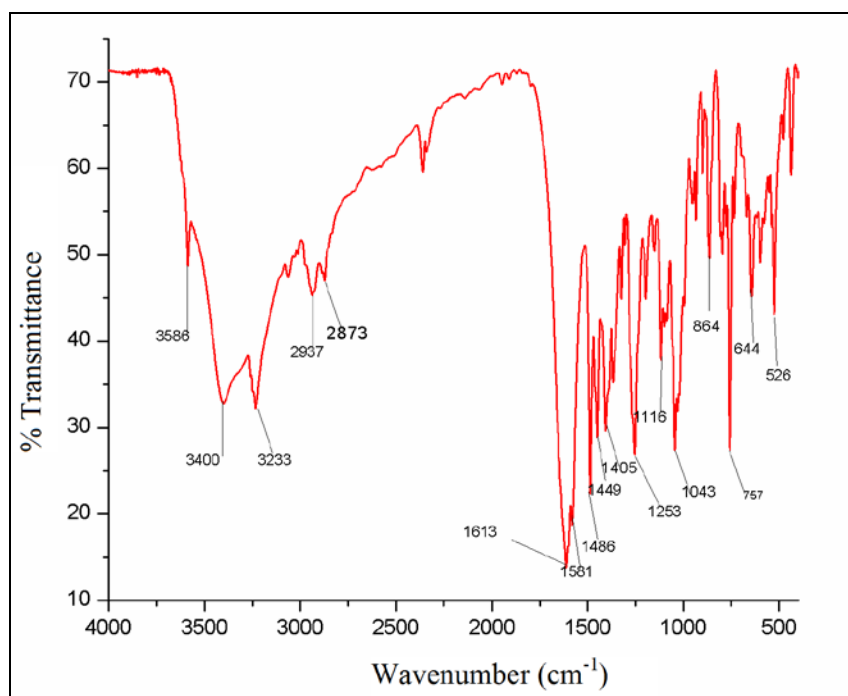

**Fig. S13** FTIR Spectrum for **1**.



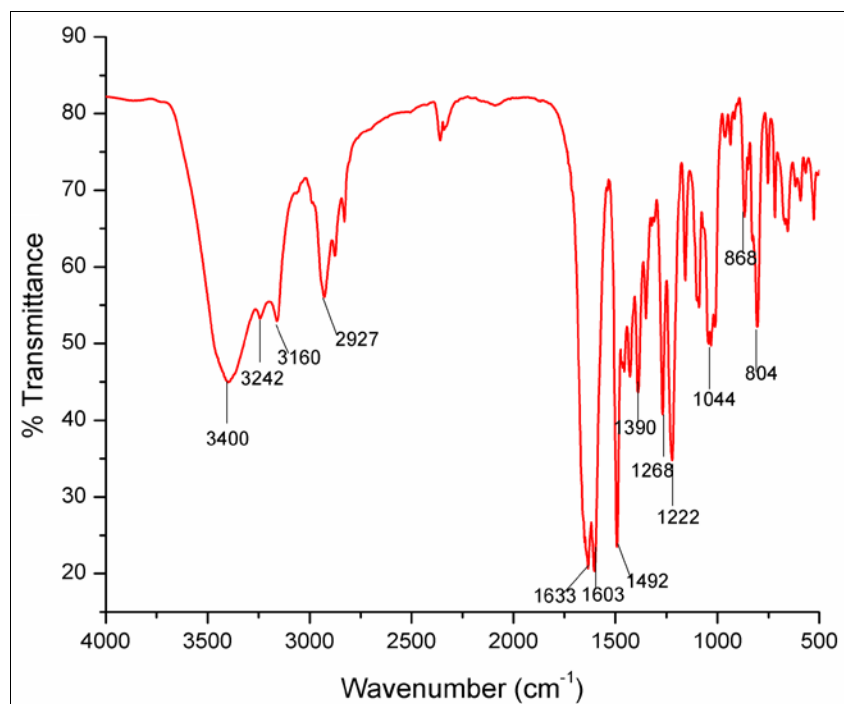

**Fig. S14** FTIR spectrum for **2**.

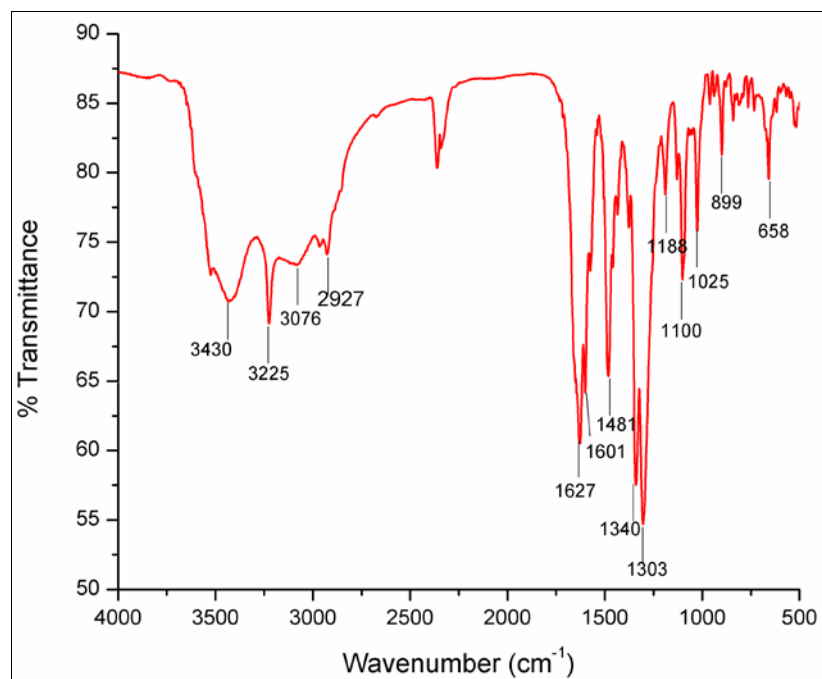

**Fig. S15** FTIR spectrum for **3**.

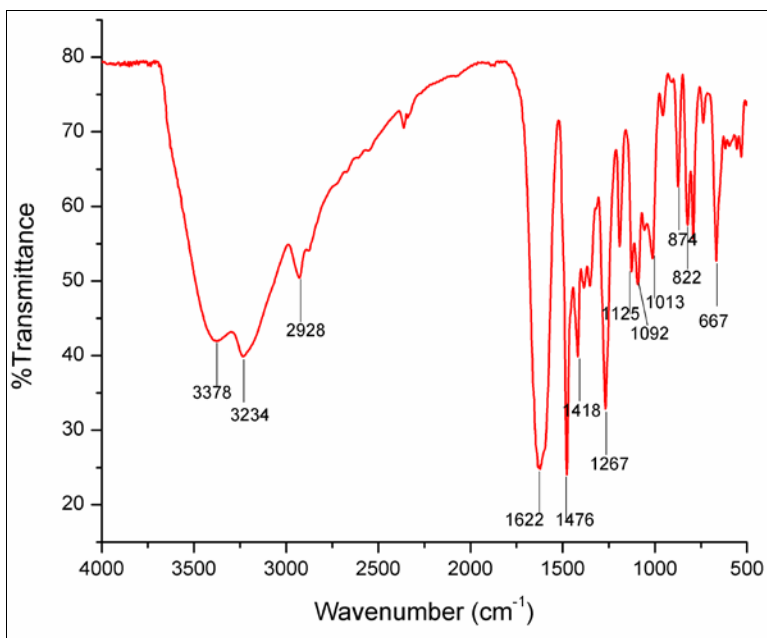

**Fig. S16** FTIR spectrum for **4**.

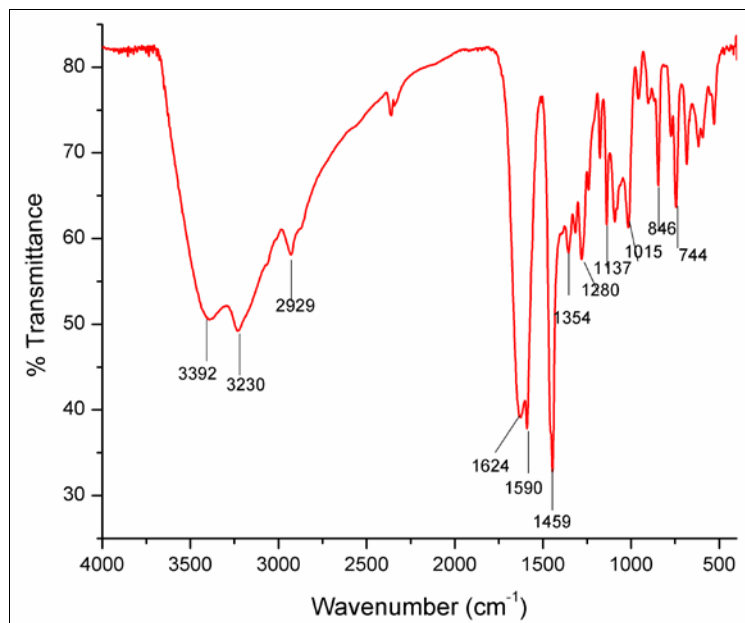

**Fig. S17** FTIR spectrum for **5**.

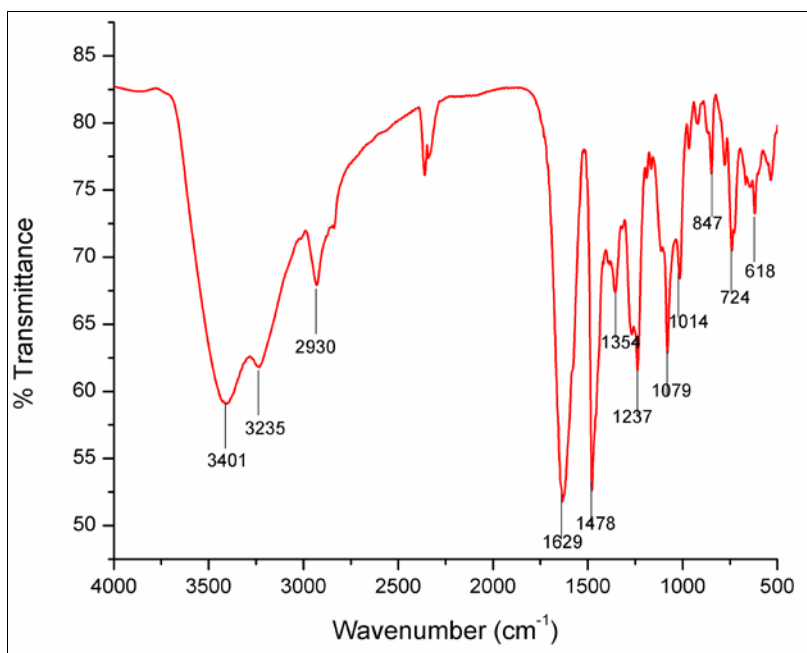

**Fig. S18** FTIR spectrum for **6**.

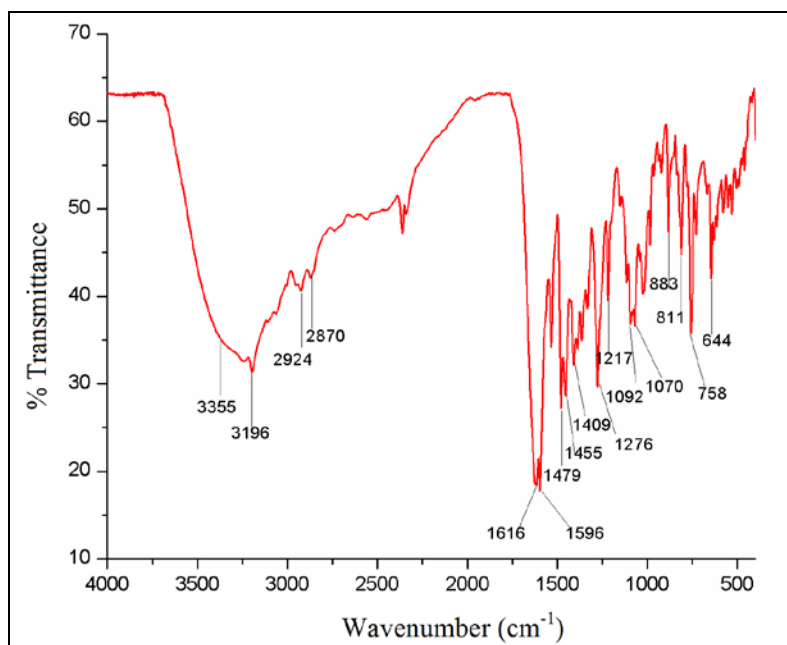

**Fig. S19** FTIR spectrum for **7**.

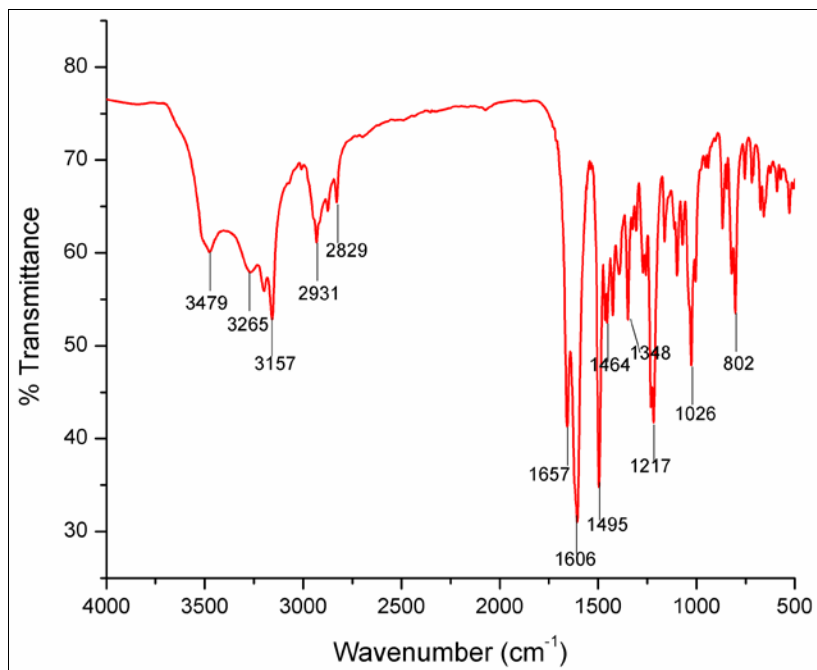

**Fig. S20** FTIR spectrum for **8**.

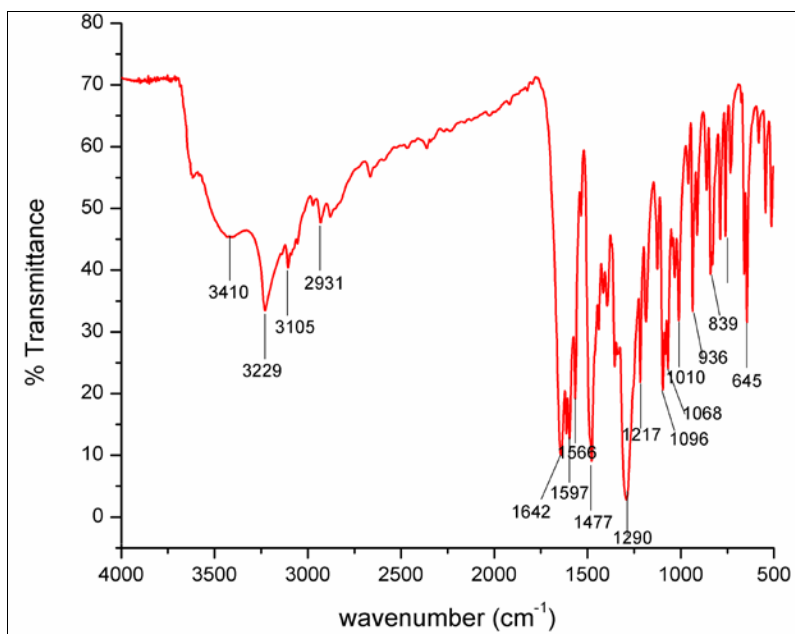

**Fig. S21** FTIR spectrum for **9**.

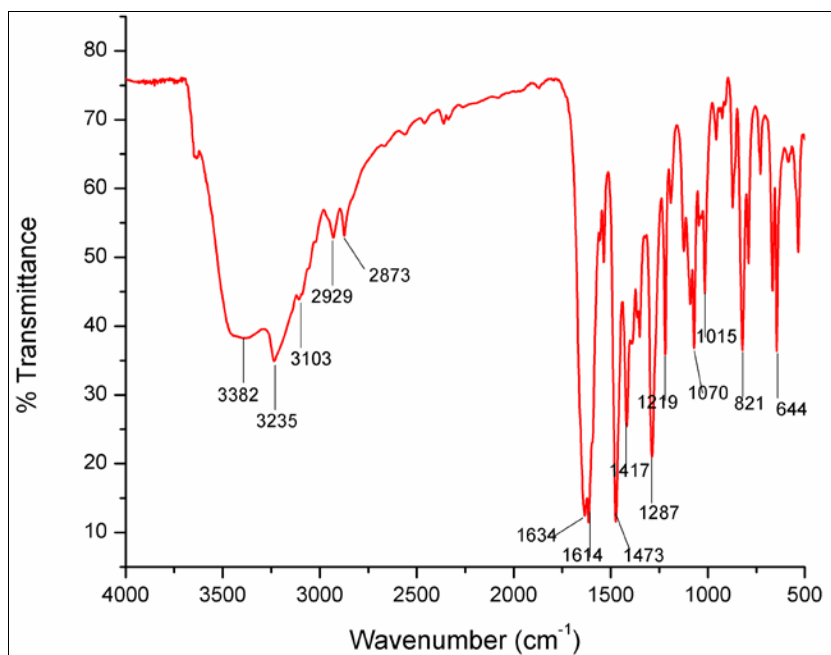

**Fig. S22** FTIR spectrum for **10**.

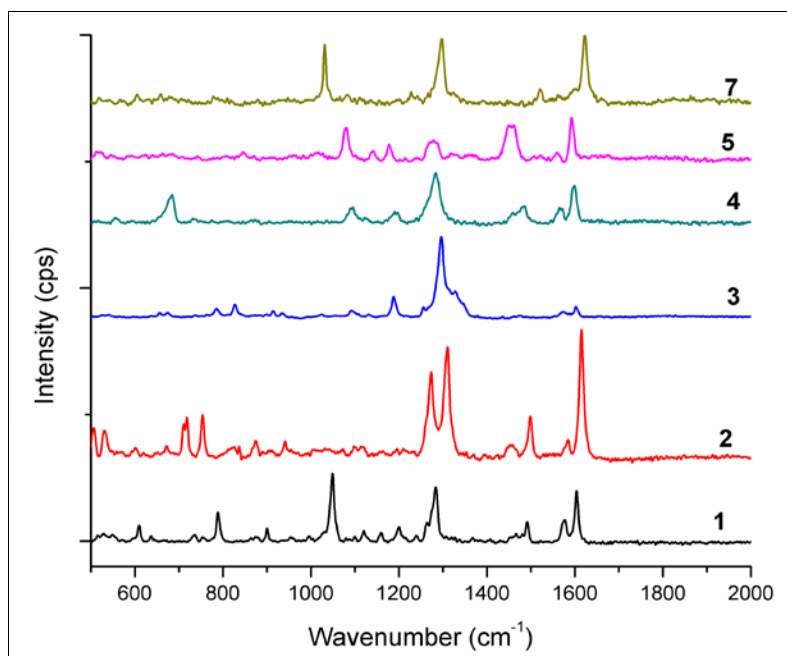

**Fig. S23** Raman spectra of **1, 2, 3, 4, 5** and **7**.

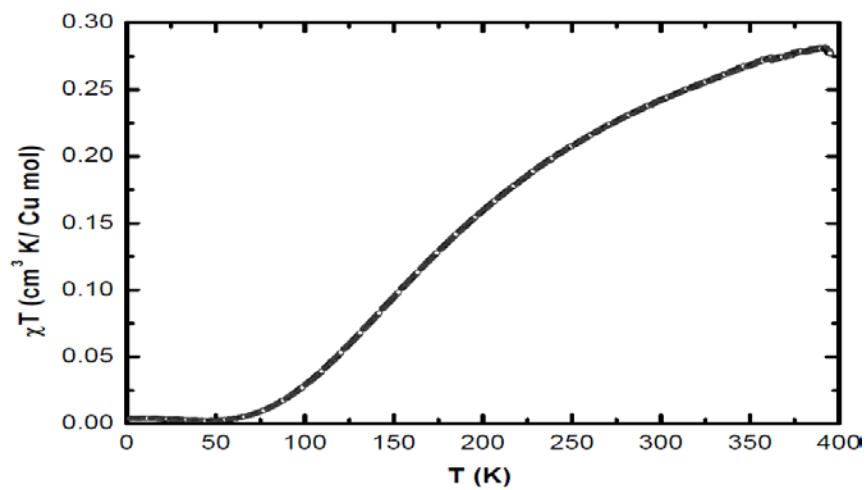

**Fig. S23** Plot of  $\chi T$  versus  $T$  data for **1**.

**Table S1.** Selected Bond lengths (Å) for **1**, **4**, **7**, **8** and **9**.

| <b>1</b> |          |        |          |
|----------|----------|--------|----------|
| Cu2-O6   | 1.920(5) | Cu2-O2 | 1.950(4) |
| Cu2-O3   | 1.973(5) | Cu2-N1 | 1.982(6) |
| Cu2-O8   | 2.360(5) | Cu1-O4 | 1.950(5) |
| Cu1-O6   | 1.958(5) | Cu1-N2 | 1.983(6) |
| Cu1-O3   | 1.989(5) | Cu1-O7 | 2.389(5) |
| <b>4</b> |          |        |          |
| Cu1-O3   | 1.925(2) | Cu1-O1 | 1.925(2) |
| Cu1-N1   | 1.966(3) | Cu1-O6 | 1.971(2) |
| Cu2-O9   | 2.257(3) | Cu2-O3 | 1.931(2) |
| Cu2-O4   | 1.939(2) | Cu2-O6 | 1.964(2) |
| Cu2-N2   | 1.984(3) |        |          |
| <b>7</b> |          |        |          |
| Cu1-O1   | 1.909(6) | Cu1-O3 | 1.933(6) |
| Cu1-N1   | 1.984(7) | Cu1-N2 | 1.997(7) |
| <b>8</b> |          |        |          |
| Cu1-O1   | 1.898(4) | Cu1-O2 | 1.952(5) |
| Cu1-N2   | 1.979(6) | Cu1-N1 | 1.997(5) |
| <b>9</b> |          |        |          |
| Cu1-O2   | 1.906(6) | Cu1-O4 | 1.930(6) |
| Cu1-N2   | 1.981(8) | Cu1-N1 | 1.991(7) |

**Table S2.** Selected Bond angles (degrees) for **1**, **4**, **7**, **8** and **9**.

| <b>1</b>   |           |            |           |
|------------|-----------|------------|-----------|
| O6-Cu2-O2  | 98.2(2)   | O6-Cu2-O3  | 80.1(2)   |
| O2-Cu2-O3  | 151.5(2)  | O6-Cu2-N1  | 174.1(2)  |
| O2-Cu2-N1  | 86.0(2)   | O3-Cu2-N1  | 94.3(2)   |
| O6-Cu2-O8  | 90.8(2)   | O2-Cu2-O8  | 109.5(2)  |
| O3-Cu2-O8  | 99.06(19) | N1-Cu2-O8  | 91.8(2)   |
| O4-Cu1-O6  | 176.7(2)  | O4-Cu1-N2  | 84.3(2)   |
| O6-Cu1-N2  | 93.4(2)   | O4-Cu1-O3  | 103.5(2)  |
| O6-Cu1-O3  | 78.8(2)   | N2-Cu1-O3  | 172.1(2)  |
| O4-Cu1-O7  | 91.52(18) | O6-Cu1-O7  | 86.31(19) |
| N2-Cu1-O7  | 96.4(2)   | O3-Cu1-O7  | 84.21(19) |
| Cu2-O8-H8A | 110.1     | Cu2-O8-H8B | 109.5     |
| C18-N1-Cu2 | 108.5(4)  | C17-N1-Cu2 | 107.6(4)  |
| C11-O3-Cu2 | 124.1(4)  | C11-O3-Cu1 | 135.3(4)  |

|            |          |            |          |
|------------|----------|------------|----------|
| Cu2-O3-Cu1 | 98.6(2)  | C10-O4-Cu1 | 115.4(4) |
| C1-O6-Cu2  | 128.1(4) | C1-O6-Cu1  | 124.4(4) |
| Cu2-O6-Cu1 | 101.5(2) | C20-O7-Cu1 | 115.6(4) |
| Cu2-N1-H1  | 108.9    | Cu1-O7-H7  | 125.(2)  |
| C19-O2-Cu2 | 114.4(4) | Cu1-N2-H2  | 107.5    |
| C8-N2-Cu1  | 109.5(4) | C7-N2-Cu1  | 110.5(4) |

#### 4

|            |            |             |            |
|------------|------------|-------------|------------|
| O3-Cu1-O1  | 177.01(11) | O3-Cu1-N1   | 93.95(10)  |
| O1-Cu1-N1  | 84.64(10)  | O3-Cu1-O6   | 79.19(9)   |
| O1-Cu1-O6  | 102.57(10) | N1-Cu1-O6   | 169.42(10) |
| O3-Cu1-Cu2 | 39.07(7)   | O1-Cu1-Cu2  | 142.43(7)  |
| N1-Cu1-Cu2 | 132.93(8)  | O6-Cu1-Cu2  | 40.30(7)   |
| O3-Cu2-O4  | 97.39(10)  | O3-Cu2-O6   | 79.21(10)  |
| O4-Cu2-O6  | 154.69(11) | O3-Cu2-N2   | 169.36(11) |
| O4-Cu2-N2  | 85.70(10)  | O6-Cu2-N2   | 93.62(10)  |
| O3-Cu2-O9  | 91.35(10)  | O4-Cu2-O9   | 104.62(10) |
| O6-Cu2-O9  | 100.54(10) | N2-Cu2-O9   | 97.73(11)  |
| O3-Cu2-Cu1 | 38.91(7)   | O4-Cu2-Cu1  | 133.05(7)  |
| O6-Cu2-Cu1 | 40.48(7)   | N2-Cu2-Cu1  | 134.02(8)  |
| O9-Cu2-Cu1 | 94.70(7)   | C1-O1-Cu1   | 114.7(2)   |
| C10-O3-Cu1 | 123.5(2)   | C10-O3-Cu2  | 132.1(2)   |
| Cu1-O3-Cu2 | 102.02(11) | C11-O4-Cu2  | 115.4(2)   |
| C2-N1-C4   | 114.1(3)   | C2-N1-Cu1   | 107.7(2)   |
| C4-N1-Cu1  | 111.0(2)   | C2-N1-H1    | 108        |
| C4-N1-H1   | 108        | Cu1-N1-H1   | 108        |
| C16-O6-Cu2 | 126.3(2)   | C16-O6-Cu1  | 134.4(2)   |
| Cu2-O6-Cu1 | 99.22(11)  | Cu2-N2-H11A | 108.5      |
| C12-N2-Cu2 | 109.0(2)   | C14-N2-Cu2  | 108.1(2)   |

#### 7

|            |          |            |          |
|------------|----------|------------|----------|
| O1-Cu1-O3  | 176.2(3) | O1-Cu1-N1  | 92.7(3)  |
| O3-Cu1-N1  | 83.7(3)  | O1-Cu1-N2  | 92.0(3)  |
| O3-Cu1-N2  | 91.7(3)  | N1-Cu1-N2  | 172.4(4) |
| C8-O3-Cu1  | 117.7(6) | C1-O1-Cu1  | 124.9(5) |
| C15-N2-Cu1 | 120.9(6) | C7-N1-Cu1  | 112.9(5) |
| C9-N1-Cu1  | 109.6(5) | C11-N2-Cu1 | 122.4(6) |
| Cu1-N1-H1  | 107.2    |            |          |

#### 8

|           |          |           |           |
|-----------|----------|-----------|-----------|
| O1-Cu1-O2 | 176.3(2) | O1-Cu1-N2 | 93.7(2)   |
| O2-Cu1-N2 | 83.1(2)  | O1-Cu1-N1 | 91.44(19) |
| O2-Cu1-N1 | 91.9(2)  | N2-Cu1-N1 | 173.2(4)  |
| Cu1-N2-H4 | 106.3    | C1-N1-Cu1 | 121.4(4)  |



|            |          |            |          |
|------------|----------|------------|----------|
| C5-N1-Cu1  | 121.5(4) | C13-O2-Cu1 | 116.2(5) |
| C12-N2-Cu1 | 110.3(4) | C11-N2-Cu1 | 113.0(5) |
| C6-O1-Cu1  | 123.2(4) |            |          |

**9**

|            |          |            |          |
|------------|----------|------------|----------|
| O2-Cu1-O4  | 172.6(3) | O2-Cu1-N2  | 83.8(3)  |
| O4-Cu1-N2  | 93.9(3)  | O2-Cu1-N1  | 91.1(3)  |
| O4-Cu1-N1  | 92.1(3)  | N2-Cu1-N1  | 170.2(4) |
| Cu1-N2-H2  | 106.5    | C5-N1-Cu1  | 122.2(6) |
| C1-N1-Cu1  | 120.9(6) | O5-N3-C9   | 118.5(8) |
| C12-N2-Cu1 | 113.1(6) | C13-N2-Cu1 | 109.6(5) |
| C14-O2-Cu1 | 116.9(6) | C6-O4-Cu1  | 122.0(5) |

**Table S3.** FTIR stretching frequencies for **1-6**.

| Compound | $\nu_{\text{OH}}$ ( $\text{cm}^{-1}$ ) | $\nu_{\text{NH}}$ ( $\text{cm}^{-1}$ ) | $\nu_{(\text{COO}^-)}$ , asymm)<br>( $\text{cm}^{-1}$ ) | $\nu_{(\text{COO}^-)}$ , symm)<br>( $\text{cm}^{-1}$ ) | $\nu_{\text{C-O}}$ (phenoxo)<br>( $\text{cm}^{-1}$ ) |
|----------|----------------------------------------|----------------------------------------|---------------------------------------------------------|--------------------------------------------------------|------------------------------------------------------|
| <b>1</b> | 3400                                   | 3233                                   | 1613, 1581                                              | 1486, 1363                                             | 1276                                                 |
| <b>2</b> | 3389                                   | 3242                                   | 1633, 1603                                              | 1492, 1390                                             | 1268                                                 |
| <b>3</b> | 3430                                   | 3225                                   | 1627, 1601                                              | 1481, 1344                                             | 1303                                                 |
| <b>4</b> | 3378                                   | 3234                                   | 1622 (br), 1594                                         | 1476, 1352                                             | 1267                                                 |
| <b>5</b> | 3392                                   | 3230                                   | 1627, 1590                                              | 1458, 1394                                             | 1280                                                 |
| <b>6</b> | 3401                                   | 3235                                   | 1629, 1576                                              | 1478, 1354                                             | 1267                                                 |

**Table S4.** FTIR stretching frequencies for **7-10**.

| Compound  | $\nu_{\text{OH}}$ ( $\text{cm}^{-1}$ ) | $\nu_{\text{NH}}$ ( $\text{cm}^{-1}$ ) | $\nu_{(\text{COO}^-)}$ ,<br>asymm)<br>( $\text{cm}^{-1}$ ) | $\nu_{(\text{COO}^-)}$ , symm)<br>( $\text{cm}^{-1}$ ) | $\nu_{\text{C-O}}$ (phenoxo)<br>( $\text{cm}^{-1}$ ) | from 4,4'-bipyridine<br>( $\text{cm}^{-1}$ ) |
|-----------|----------------------------------------|----------------------------------------|------------------------------------------------------------|--------------------------------------------------------|------------------------------------------------------|----------------------------------------------|
| <b>7</b>  | 3355                                   | 3196                                   | 1616                                                       | 1479                                                   | 1276                                                 | 1217                                         |
| <b>8</b>  | 3479                                   | 3265                                   | 1657                                                       | 1495                                                   | 1272                                                 | 1217                                         |
| <b>9</b>  | 3410                                   | 3229                                   | 1642                                                       | 1477                                                   | 1290                                                 | 1217                                         |
| <b>10</b> | 3382                                   | 3235                                   | 1634                                                       | 1473                                                   | 1287                                                 | 1219                                         |

**Table S5.** UV-vis data for **1-6** (350 nm – 700 nm).

| Compound | $\lambda$ , nm ( $\epsilon$ , $\text{L}\cdot\text{mol}^{-1}\cdot\text{cm}^{-1}$ ) | $\lambda$ , nm ( $\epsilon$ , $\text{L}\cdot\text{mol}^{-1}\cdot\text{cm}^{-1}$ ) |
|----------|-----------------------------------------------------------------------------------|-----------------------------------------------------------------------------------|
| <b>1</b> | 675 (123)                                                                         | 371 (883)                                                                         |
| <b>2</b> | 680 (48)                                                                          | 400 (296)                                                                         |
| <b>3</b> | 684 (70)                                                                          | 372 (2257)                                                                        |
| <b>4</b> | 663 (34)                                                                          | 379 (328)                                                                         |
| <b>5</b> | 679 (64)                                                                          | 376 (331)                                                                         |
| <b>6</b> | 672 (55)                                                                          | 418 (519)                                                                         |

**Table S6.** UV-vis data for **7-10** (350 nm – 700 nm).

| Compound  | $\lambda$ , nm ( $\epsilon$ , L·mol <sup>-1</sup> ·cm <sup>-1</sup> ) | $\lambda$ , nm ( $\epsilon$ , L·mol <sup>-1</sup> ·cm <sup>-1</sup> ) |
|-----------|-----------------------------------------------------------------------|-----------------------------------------------------------------------|
| <b>7</b>  | 655 (213)                                                             | 389 (736)                                                             |
| <b>8</b>  | 657 (40)                                                              | 394 (289)                                                             |
| <b>9</b>  | 680 (40)                                                              | 392 (4757)                                                            |
| <b>10</b> | 673 (21)                                                              | 403 (137)                                                             |

**Table S7.** Peaks in CD spectra of **1-6**.

| Compound | Positive Cotton Effect (nm) | Negative Cotton Effect (nm) |
|----------|-----------------------------|-----------------------------|
| <b>1</b> | 650, 495, 265, 245, 208     | 600, 400, 309, 225, 222     |
| <b>2</b> | 654, 265, 245               | 565, 435, 299, 262, 224     |
| <b>3</b> | 664, 345, 236, 212          | 403, 306, 221               |
| <b>4</b> | 644, 273, 273, 251          | 482, 401, 295, 221          |
| <b>5</b> | 651, 504, 271, 245          | 575, 394, 296, 223          |
| <b>6</b> | 664, 524, 267, 247          | 569, 416, 225               |

**Table S8.** Peaks in CD spectra of **7-10**.

| Compound  | Positive Cotton Effect (nm) | Negative Cotton Effect (nm) |
|-----------|-----------------------------|-----------------------------|
| <b>7</b>  | 630, 260, 240, 200          | 500, 400, 309               |
| <b>8</b>  | 648, 340, 271, 245          | 512, 430, 309               |
| <b>9</b>  | 641, 343, 292               | 537, 399, 305, 264          |
| <b>10</b> | 658, 277, 251               | 487, 396, 308               |

**Table S9.** Thermogravimetric analysis for **1-6**.

| Compound | 1 <sup>st</sup> step loss |          |                                                | 2 <sup>nd</sup> Step loss |          |                                            |
|----------|---------------------------|----------|------------------------------------------------|---------------------------|----------|--------------------------------------------|
|          | Obsd. %                   | Calcd. % | Loss                                           | Obsd. %                   | Calcd. % | Loss                                       |
| <b>1</b> | 9.30                      | 10.30    | 2.5 H <sub>2</sub> O (l), H <sub>2</sub> O (c) | 58.60                     | 57.98    | Ligands (H <sub>3</sub> Sersal+serine)     |
| <b>2</b> | 11.67                     | 10.50    | DMF (l)                                        | 45.67                     | 48.49    | H <sub>2</sub> O (c), Metal-ligand complex |
| <b>3</b> | 6.33                      | 5.22     | 2 H <sub>2</sub> O (l)                         | 79.53                     | 76.52    | H <sub>2</sub> O (c), Ligand               |
| <b>4</b> | 5.38                      | 5.53     | H <sub>2</sub> O (l)                           | 49.02                     | 46.60    | H <sub>2</sub> O (c), Metal-ligand complex |
| <b>5</b> | 10.22                     | 10.49    | 3 H <sub>2</sub> O (l), H <sub>2</sub> O (c)   | 37.08                     | 38.20    | Ligand                                     |
| <b>6</b> | 8.92                      | 7.97     | 3 H <sub>2</sub> O (l)                         | 41.39                     | 40.60    | H <sub>2</sub> O (c), Ligand               |

l, lattice; c, coordinated

**Table S10.** Thermogravimetric analysis for **7-10**.

| Compound  | 1 <sup>st</sup> step loss |          |                        | 2 <sup>nd</sup> Step loss |          |                                                     | 3 <sup>rd</sup> Step loss |          |                           |
|-----------|---------------------------|----------|------------------------|---------------------------|----------|-----------------------------------------------------|---------------------------|----------|---------------------------|
|           | Obsd. %                   | Calcd. % | Loss                   | Obsd. %                   | Calcd. % | Loss                                                | Obsd. %                   | Calcd. % | Loss                      |
| <b>7</b>  | 2.40                      | 2.40     | H <sub>2</sub> O (l)   | 15.80                     | 13.40    | H <sub>2</sub> O (l),<br>0.5 (4,4'-bpy)             | 37.30                     | 38.90    | 0.5 (4,4'-bpy),<br>ligand |
| <b>8</b>  | 4.83                      | 4.14     | 2 H <sub>2</sub> O (l) | 21.06                     | 18.00    | 4 H <sub>2</sub> O (l),<br>0.5 (4,4'-bpy)           | 32.85                     | 37.70    | 0.5 (4,4'-bpy),<br>ligand |
| <b>9</b>  | 4.63                      | 4.35     | 2 H <sub>2</sub> O (l) | 25.68                     | 19.72    | 4,4'-bpy                                            | 13.74                     | 13.27    | ligand                    |
| <b>10</b> | 5.15                      | 5.90     | 3 H <sub>2</sub> O (l) | 23.90                     | 19.62    | H <sub>2</sub> O (l),<br>DMF (l),<br>0.5 (4,4'-bpy) | 21.69                     | 20.00    | 0.5 (4,4'-bpy),<br>ligand |

l, lattice
